# Supplementary material for: Unexpected Diagnosis of Struma Ovarii in a Patient with Bilateral Tubo-Ovarian Abscess: A Case Report
Source: Research Square preprint supplement (doi:10.21203/rs.3.rs-7213112/v1), 2025-08-05
Supplement: Supplementary file 1 [file 4475c65476a6445d9ba3e2c3.pdf]

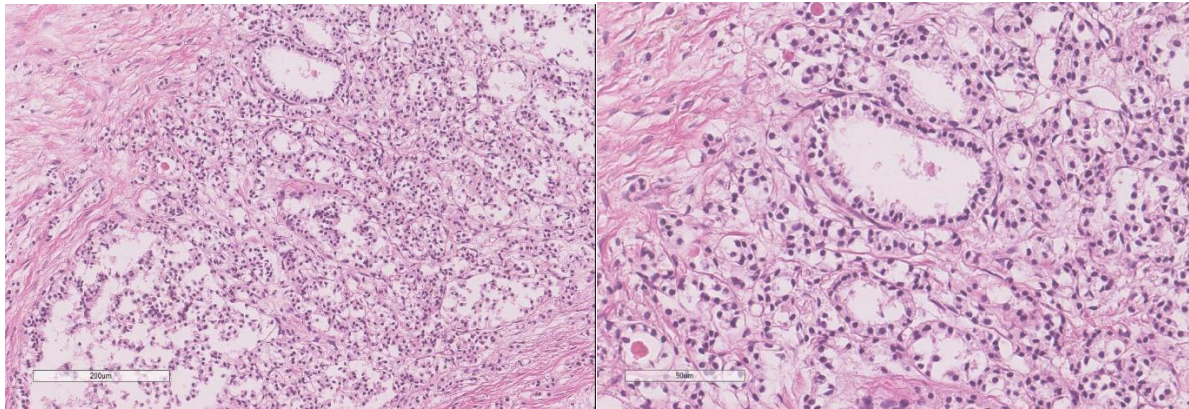

A

B

Fig 5. The microscopic findings of struma ovarii in the right ovary. A: The cystic lesion is composed of variable sized thyroid follicles with bland-cytologic features(H&E, x40). B: The thyroid follicles are lined by cuboidal cells without atypia, and occasionally filled with eosinophilic colloid(H&E, x100).
