# Supplementary figures and images for: Unexpected Diagnosis of Struma Ovarii in a Patient with Bilateral Tubo-Ovarian Abscess: A Case Report
Source: Research Square preprint supplement (doi:10.21203/rs.3.rs-7213112/v1), 2025-08-05

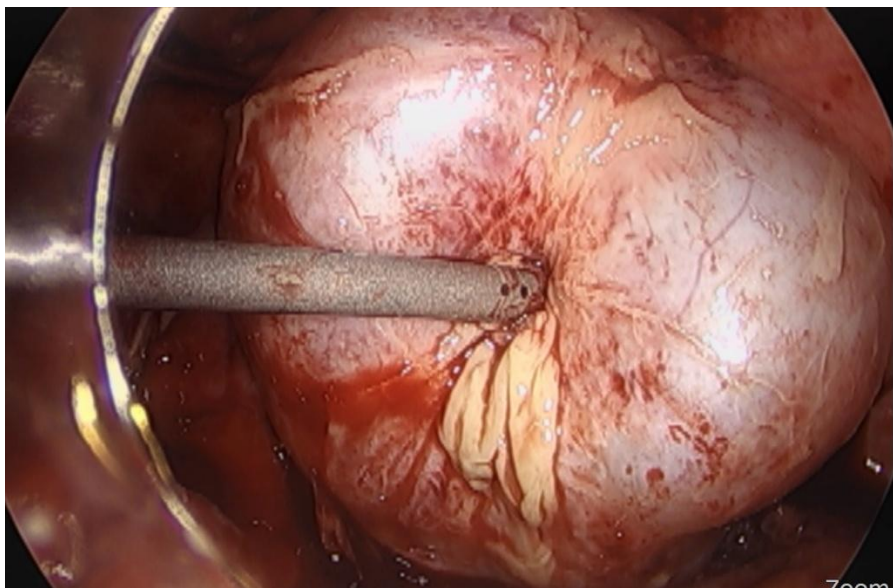

Fig 3. The right ovary cyst identified during laparoscopic surgery

Supplement: Supplementary file 2 [file 979740c32cbf260c462fd456.pdf]
